# Supplementary material for: A Holistic Analysis of Team Dynamics Using Relational Coordination as the Measure regarding Student Athlete Total Load: A Cross-Sectional Study
Source: MDPI journal article supplement (doi:10.3390/sports11050104), 2023-05-13
Supplement: s1 [file s1]

**Table 1***The Likert scale in the relational coordination survey*

| Item              | The Likert scale (1 through 5) |            |              |          |              |              |
|-------------------|--------------------------------|------------|--------------|----------|--------------|--------------|
| FREQ <sup>1</sup> | Far too little                 | Too little | Just right   | Too much | Far too much | Not relevant |
| TIME              | Never                          | Rarely     | Occasionally | Often    | Always       | Not relevant |
| ACCUR             | Never                          | Rarely     | Occasionally | Often    | Always       | Not relevant |
| PROBL             | Never                          | Rarely     | Occasionally | Often    | Always       | Not relevant |
| GOAL              | Not at all                     | A little   | Somewhat     | A lot    | Completely   | Not relevant |
| KNOW              | Not at all                     | A little   | Somewhat     | A lot    | Completely   | Not relevant |
| RESP              | Not at all                     | A little   | Somewhat     | A lot    | Completely   | Not relevant |

*Note.* FREQ = frequent communication; TIME = timely communication; ACCUR = accurate

communication; PROBL = Problem-solving communication; GOAL = Shared goals; KNOW; Shared knowledge; RESP = Mutual respect.

<sup>1</sup>More frequent communication does not indicate higher quality communication. Responses for this question was recoded for analysis such that 1 = "Far too little", 2 = "Far too much", 3 = "Too little", 4 = "Too much", and 5 = "Just right" (Gittell, 2018).
